# Supplementary material
Source: MDPI journal article supplement (https://www.mdpi.com/1999-4907/7/3/55)
Supplement: s1 [file s1]

# Supplementary Materials: Tropical Forest Gain and Interactions amongst Agents of Forest Change

**Table S1.** Profile of mestizo and Emberá communities in the Bayano-Darién Region according to household survey data (2000–2006) and census data (2000/01). Ranges are denoted by brackets.

|                                                                                                           | Mestizo Communities                  |                          | Emberá Communities                   |                            |
|-----------------------------------------------------------------------------------------------------------|--------------------------------------|--------------------------|--------------------------------------|----------------------------|
| <b>Household Survey Data</b>                                                                              |                                      |                          |                                      |                            |
| Mean annual income <sup>d</sup>                                                                           | \$7,458                              |                          | \$6,473 †                            |                            |
| Mean timber-extraction income <sup>d</sup>                                                                |                                      |                          |                                      |                            |
| All households                                                                                            | \$4898 (23% total income)            |                          | \$3199 (27%) †                       |                            |
| Timbering households                                                                                      | \$16,738 (77% total income)          |                          | \$6219 (49%) †                       |                            |
| Mean income from cattle (\$)                                                                              | <u>2001</u> <sup>a</sup>             | <u>2005</u> <sup>a</sup> |                                      |                            |
| All households                                                                                            | 1140 (0–13,500)                      | 1510 (0–23,000)          | -                                    |                            |
| Households with cattle                                                                                    | 3370 (0–13,500)                      | 2740 (0–23,000)          | -                                    |                            |
| Mean no. cattle per household                                                                             | <u>2001</u> <sup>a</sup>             | <u>2006</u> <sup>a</sup> | <u>2004</u> <sup>b</sup>             |                            |
| All households                                                                                            | 17.1 (0–250)                         | 24.7 (0–250)             | 1.2                                  |                            |
| Households with cattle                                                                                    | 41.37 (3–250)                        | 43.9 (2–250)             | 14.7                                 |                            |
| Mean landholdings (ha)                                                                                    | <u>2000</u> <sup>a</sup>             | <u>2006</u> <sup>a</sup> | <u>2006</u> <sup>c</sup>             |                            |
|                                                                                                           | 47.1 (1–295)                         | 54.9 (1–578)             | 38.8 (0–140)                         |                            |
| Landholding division (%)                                                                                  | <u>2000</u> <sup>a</sup>             | <u>2006</u> <sup>a</sup> | <u>1998</u> <sup>†,Δ</sup>           | <u>2006</u> <sup>b,Δ</sup> |
| Forest                                                                                                    | 24                                   | 19                       | 46                                   | 46                         |
| Forest fallow                                                                                             | 16                                   | 14                       | 15                                   | 26                         |
| Pasture                                                                                                   | 29                                   | 43                       | 14                                   | 18                         |
| Annual crops                                                                                              | 31                                   | 23                       | 19                                   | 10 <sup>§</sup>            |
| <b>Census Data</b>                                                                                        |                                      |                          |                                      |                            |
| Percent agricultural households dependent on non-farm activity for majority of income                     | 53%<br>( <i>n</i> = 341)             |                          | 40%<br>( <i>n</i> = 111)             |                            |
| Median monthly income (\$), males 18–64 years old engaged in agriculture and/or ranching (month of May) * | 125 (5–2000)<br>( <i>n</i> = 261)    |                          | 60 (7–870)<br>( <i>n</i> = 57)       |                            |
| Mean annual cattle income (\$)                                                                            |                                      |                          |                                      |                            |
| All individuals                                                                                           | 4067 (0–208,000)                     |                          | 168 (0–4000)                         |                            |
| Individuals with cattle                                                                                   | 15,901 (240–208,000)                 |                          | 1866 (260–4000)                      |                            |
| Mean number of cattle per farm                                                                            |                                      |                          |                                      |                            |
| All farms                                                                                                 | 31.9 (0–671, <i>n</i> = 340)         |                          | 4.5 (0–123, <i>n</i> = 111)          |                            |
| Farms with cattle                                                                                         | 87.6 (1–671, <i>n</i> = 124)         |                          | 22.8 (1–123, <i>n</i> = 22)          |                            |
|                                                                                                           | 40.31 (mean)                         |                          | 45.94 (mean)                         |                            |
|                                                                                                           | 4 (median)                           |                          | 30 (median)                          |                            |
| Landholdings (ha)                                                                                         | 0.04–740                             |                          | 0.10–200                             |                            |
|                                                                                                           | 13,707 (total)<br><i>n</i> = 340     |                          | 5099 (total)<br><i>n</i> = 111       |                            |
| Landholding (% total area)                                                                                |                                      |                          |                                      |                            |
| Forest, tall fallow                                                                                       | 4.7                                  |                          | 32.5                                 |                            |
| Young fallow                                                                                              | 6.9                                  |                          | 15.4                                 |                            |
| Pasture                                                                                                   | 31.3                                 |                          | 13.9                                 |                            |
| Annual crops                                                                                              | 14.3                                 |                          | 10.9                                 |                            |
| Mean number of household members                                                                          | 4.0<br>( <i>n</i> = 455 households)  |                          | 5.65<br>( <i>n</i> = 124 households) |                            |
| Percent males aged 16–64 years *                                                                          | 61%<br>( <i>n</i> = 996 total males) |                          | 40%<br>( <i>n</i> = 324 total males) |                            |
| Percent farms using                                                                                       |                                      |                          |                                      |                            |
| Fertiliser (for crops)                                                                                    | 11                                   |                          | 2.7                                  |                            |
| Herbicide (for pasture)                                                                                   | 14                                   |                          | 10                                   |                            |

Sources: Household survey data are from either <sup>a</sup> the survey by the author; <sup>b</sup> Reference [1]; <sup>c</sup> Reference [2]; <sup>d</sup> Reference [3]; or <sup>e</sup> Reference [4]. Census data are from census microdata of the Population/Housing (2000) and Agricultural (2001) censuses. Notes: Census data encompass the Emberá communities of Ipetí Choco and Piriati as well as the Mestizo communities of Agua Fría No.1 (P), Cañazas, Higueronal, Ipetí Colono, Loma Bonita, Playa Chuzo, and Wacuco. Household survey data refer to the community of Ipetí Emberá, except data on annual income and timber income. Δ Figures for the Tierra Colectiva (Common Lands) of the Emberá community of Ipetí Emberá. Figures for 1998 do not sum to 100, as 5% of the Tierra Colectiva was allocated to the community proper. § Includes perennial crops, such as plantains, common amongst the Emberá but rare amongst Mestizo landholders. † Includes Kuna as well as Emberá indigenous. Kuna indigenous in the Bayano are generally poorer than the Emberá. ‡ Total household labour is estimated from the averages of male and female labour of poor, medium and richer household cohorts reported by Tschakert, Coomes, and Potvin [5]. \* For these census estimates, only Mestizos and ethnic Emberá were selected as respondents within Mestizo and Emberá communities, respectively. Ethnicity was as reported by census respondents.

## Reference

1. Potvin, C.; Tschakert, P.; Lebel, F.; Kirby, K.; Barrios, H.; Bocariza, J.; Caisamo, J.; Caisamo, L.; Casamá, J.; Casamá, M.; *et al.* A participatory approach to the establishment of a baseline scenario for a reforestation Clean Development Mechanism project. *Mitig. Adapt. Strateg. Glob. Chang.* **2007**, *12*, 1341–1362.
2. Coomes, O.; Grimard, F.; Potvin, C.; Sima, P. The fate of tropical forests: carbon or cattle? *Ecol. Econ.* **2008**, *65*, 207–212.
3. Simmons, C.S. Forest management practices in the Bayano region of Panama: Cultural variations. *World Dev.* **1997**, *25*, 989–1000.
4. Potvin, C.; Tschakert, P.; Lebel, F.; Kirby, K.; Barrios, H.; Bocariza, J.; Caisamo, J.; Caisamo, L.; Casamá, J.; Casamá, M.; *et al.* Proyecto de Mecanismo de Desarrollo Limpio con la Comunidad de Ipetí-Emberá, Panamá. In *Presentation at the Foundations of Environmental Policy Seminar of The Neotropical Environmental Option Group of McGill University and The Smithsonian Tropical Research Institute*; Casa 5; City of Knowledge: Panama City, Panama, 2007.
5. Tschakert, P.; Coomes, O.T.; Potvin, C. Indigenous livelihoods, slash-and-burn agriculture and carbon stocks in Eastern Panama. *Ecol. Econ.* **2007**, *60*, 807–820.

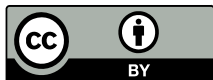

© 2016 by the authors; licensee MDPI, Basel, Switzerland. This article is an open access article distributed under the terms and conditions of the Creative Commons by Attribution (CC-BY) license (<http://creativecommons.org/licenses/by/4.0/>).
